# Supplementary material for: Are we ready for "green surgery" to promote environmental sustainability in the operating room? Results from the WSES STAR investigation
Source: World J Emerg Surg. 2024 Jan 24;19:5. doi: 10.1186/s13017-024-00533-y (PMC10809586; doi:10.1186/s13017-024-00533-y)
Supplement: Supplementary file 1 — Additional file 1. STAR Study Group members. [file 13017_2024_533_MOESM1_ESM.xlsx]

## Sheet: Foglio1
Please accept the privacy policy as reported by https://www.wses.org.uk/privacy	Do you want to join the Team Dynamics study group to be included in the final scientific paper? [please select one]	email address	Surname/Family Name	Given name	If you replied yes to question #1, please type your affiliation [please type - e.g. "Department of General Surgery, Berlin University Hospital"]	If you replied yes to question #1, please type your affiliation city [please type - e.g. "Berlin"]	Country
Yes, I accept the privacy policy terms	Yes	tameralnaimy@hotmail.com	A.A.M.Habeeb	Tamer	Department of general surgery, Zagazig university	Sharkia	Egypt
Yes, I accept the privacy policy terms	Yes	kenneth.abbott@surgery.ufl.edu	Abbott	Kenneth	Department of Surgery, University of Florida	Gainesville	United States
Yes, I accept the privacy policy terms	Yes	Essanisr298@gmail.com	Abdalla	Essameldeen	Department of General & vascular surgery, Raigmore hospital	Inverness	United Kingdom
Yes, I accept the privacy policy terms	Yes	mr.dr.hashim.abdalla@outlook.com	Abdalla	Hashim	Department of General Surgery, New Cross Hospital	Wolverhampton	United Kingdom
Yes, I accept the privacy policy terms	Yes	hiba.abdalla@nuh.NHS.uk	ABDALLA	HIBA	Department of Vascular Surgery, Queenâ€™s Medical Centre , NUH	Nottingham	United Kingdom
Yes, I accept the privacy policy terms	Yes	hassan.osama2010@gmail.com	ABUALI	Hassan	Department of General Surgery, Newham University Hospital	London	United Kingdom
Yes, I accept the privacy policy terms	Yes	monaawad91@yahoo.com	Abuelgasim	Mona	Department of surgery ,Royal Devon an Exeter	Devon	United Kingdom
Yes, I accept the privacy policy terms	Yes	fabuzidan@uaeu.ac.ae	Abu-Zidan	Fikri	The Research Office, College of Medicine and Health Sciences, United Arab Emirates University	Al-Ain	United Arab Emirates
Yes, I accept the privacy policy terms	Yes	ichadmigm@gmail.com	Adamovich	Dmitry	Department of Surgical Diseases II, Gomel State Medical University	Gomel	Belarus
Yes, I accept the privacy policy terms	Yes	adeyeye_ademola@yahoo.com	ADEYEYE	ADEMOLA	Department of Surgery, Afe Babalola University	Ado-Ekiti	Nigeria
Yes, I accept the privacy policy terms	Yes	ferdinandoagresta@gmail.com	AGRESTA	FERDINANDO	Dept. of General Surgery, AULSS2 Trevigiana del Veneto	Vittorio Veneto (TV)	Italy
Yes, I accept the privacy policy terms	Yes	salma.a.ahmed@hotmail.com	Ahmed	Salma	Department of General Surgery, Countess of Chester Hospital	Chester	United Kingdom
Yes, I accept the privacy policy terms	Yes	laliakhmeteli@gmail.com	akhmeteli	lali	Department of Surgey, Tbilisi	Tbilisi	Georgia
Yes, I accept the privacy policy terms	Yes	halexandrino123@gmail.com	Alexandrino	Henrique	Faculty of Medicine, University of Coimbra	Coimbra	Portugal
Yes, I accept the privacy policy terms	Yes	dr.omersiddig2014@gmail.com	Ali	Omer	Department of General Surgery, Royal Blackburn Hospital	Blackburn	United Kingdom
Yes, I accept the privacy policy terms	Yes	alismc2051@gmail.com	Ali	Syed Muhammad Ali	Department of Acute Care Surgery, Hamad Medical Corporation	Doha	Qatar
Yes, I accept the privacy policy terms	Yes	M.alshahary@gmail.com	Al-Shehari	Mohammed	Department of General Surgery, Al-Thawra Modern General Hospital	Sana'a	Yemen
Yes, I accept the privacy policy terms	Yes	michele.altomare@uniroma1.it	Altomare	Michele	Department of Surgical Sciences, Sapienza, University of Rome, Rome, Italy	Rome	Italy
Yes, I accept the privacy policy terms	Yes	Francesco.amico@health.nsw.gov.au	Amico	Francesco	Department of Traumatology, John Hunter Hospital	Newcastle	Australia
Yes, I accept the privacy policy terms	Yes	michele.ammendola@unicz.it	Ammendola	Michele	Health of Science Department, "Magna Graecia" University Medical School, "Mater Domini" Hospital	Catanzaro	Italy
Yes, I accept the privacy policy terms	Yes	jacopo.andreuccetti@gmail.com	Andreuccetti	Jacopo	General Surgery 2, ASST Spedali Civili of Brescia	Brescia	Italy
Yes, I accept the privacy policy terms	Yes	elissavetxatz@gmail.com	Anestiadou	Elissavet	Department of General Surgery, Aristotle University of Thessaloniki, Greece	Thessaloniki	Greece
Yes, I accept the privacy policy terms	Yes	amedeoantonelli01@gmail.com	Antonelli	Amedeo	Department of general surgery, rome tor vergata university	Rome	Italy
Yes, I accept the privacy policy terms	Yes	Boyko.Atanasov@mu-plovdiv.bg	ATANASOV	BOYKO	Surgical department of UMHAT Eurohospital Medical university of Plovdiv Bulgaria	Plovdiv	Bulgaria
Yes, I accept the privacy policy terms	Yes	augustin.goran@gmail.com	Augustin	Goran	Department of Surgery, University Hospital Centre Zagreb	Zagreb	Croatia
Yes, I accept the privacy policy terms	Yes	selmysabry2007@yahoo.com	AWAD	SELMY S	Department of General Surgery,Mansoura university hospitals	Mansoura	Egypt
Yes, I accept the privacy policy terms	Yes	efstratia.baili@gmail.com	Baili	Efstratia	Guys and StThomas Hospital, London,UK	London	United Kingdom
Yes, I accept the privacy policy terms	Yes	lovenishbains@gmail.com	Bains	Lovenish	Department of Surgery, Maulana Azad Medical College	New Delhi	India
Yes, I accept the privacy policy terms	Yes	rbalam@hadassah.org.il	Bala	Miklosh	Department of General Surgery, Hadassah Medical Center and Faculty of Medicine, Hebrew University of Jerusalem	Jerusalem	Israel
Yes, I accept the privacy policy terms	Yes	ebaldini@inwind.it	Baldini	Edoardo	UOC Chirurgia - Ospedale Santa Maria delle Stelle	Melzo	Italy
Yes, I accept the privacy policy terms	Yes	balioan@hotmail.com	Baloyiannis	Ioannis	Department of Surgery, University Hospital of Larissa	Larissa	Greece
Yes, I accept the privacy policy terms	Yes	oubaraket@gmail.com	Baraket	oussama		bizerte	Tunisia
Yes, I accept the privacy policy terms	Yes	brylsuman.sur@gmail.com	Baral	Suman	Department of Surgery, Dirghayu Pokhara Hospital	Pokhara	Nepal
Yes, I accept the privacy policy terms	Yes	mir87mb@libero.it	Barone	Mirko	Department of General and Thoracic Surgery, SS. Annunziata University Hospital of Chieti	Chieti	Italy
Yes, I accept the privacy policy terms	Yes	riccardo.barone@aslto3.piemonte.it	BARONE	RICCARDO	Department of General Surgery, Rivoli Hospital (Turin, Italy)	Rivoli (Turin)	Italy
Yes, I accept the privacy policy terms	Yes	albertober.21@gmail.com	Barranquero	Alberto G	Department of General and Digestive Surgery, Hospital Universitari Arnau de Vilanova	Lleida	Spain
Yes, I accept the privacy policy terms	Yes	zulfubayhan@gmail.com	Bayhan	Zulfu	Department of General Surgery, Sakarya University Faculty of Medicine	Sakarya	Turkey
Yes, I accept the privacy policy terms	Yes	Hazembj@gmail.com	Beji	Hazem	Department of general surgery, Hospital Mohamed Taher Maamouri, Nabeul, Tunisia	Nabeul	Tunisia
Yes, I accept the privacy policy terms	Yes	alessandro@bergna.eu	BERGNA	ALESSANDRO	Chirurgia Generale, Ospedale Maggiore di Crema	Crema	Italy
Yes, I accept the privacy policy terms	Yes	hamzawaqarbhatti@gmail.com	BHATTI	HAMZA WAQAR	General Surgery, Benazir Bhutto Hospital	Rawalpindi	Pakistan
Yes, I accept the privacy policy terms	Yes	carbia04@unipv.it	Bianchi	Carlo Maria	SC Chirurgia Generale 1 - Dipartimento Emergenza Urgenza - Fondazione IRCCS Policlinico San Matteo - Pavia	Pavia	Italy
Yes, I accept the privacy policy terms	Yes	Raluca.bievel@yahoo.com	Bievel Radulescu	Raluca	Carol Davila university of medicine	Bucharest	Romania
Yes, I accept the privacy policy terms	Yes	Walt@biffl.com	BIFFL	WALTER	Trauma/Acute Care Surgery, Scripps Clinic Medical Group	La JOlla, CA	United States
Yes, I accept the privacy policy terms	Yes	alanbiloslavo@hotmail.com	Biloslavo	Alan	Department of General Surgery, Cattinara University Hospital	trieste	Italy
Yes, I accept the privacy policy terms	Yes	danielebissaccomd@gmail.com	Bissacco	Daniele	Department of Clinical Sciences and Community Health, University of Milan	Milan	Italy
Yes, I accept the privacy policy terms	Yes	dr.bogdanic@gmail.com	Bogdanic	Branko	School of Medicine, University of Zagreb, Department of Surgery, University Hospital Centre Zagreb, St. Catherine Specialty Hospital	Zagreb	Croatia
Yes, I accept the privacy policy terms	Yes	dr.alessandroborello@gmail.com	Borello	Alessandro	Department of general surgery, Rivoli (TO) Hospital	Rivoli (TO)	Italy
Yes, I accept the privacy policy terms	Yes	andrea.bottari22@gmail.com	Bottari	Andrea	U.O.C. Chirurgia Generale, Ospedale La Gruccia Montevarchi	Montevarchi (Arezzo)	Italy
Yes, I accept the privacy policy terms	Yes	kbouchagier@windowslive.com	BOUCHAGIER	KONSTANTINOS	Department of General Surgery ,Patras University Hospital	Patras	Greece
Yes, I accept the privacy policy terms	Yes	kwstisbool@yahoo.com	BOULIARIS	KONSTANTINOS	DEPARTMENT OF GENERAL SURGERY, GENERAL HOSPITAL OF LARISSA	LARISSA	Greece
Yes, I accept the privacy policy terms	Yes	gioia.brachini@uniroma1.it	Brachini	Gioia	Department of Emergency, Policlinico Umberto I, Sapienza University, Roma	Rome	Italy
Yes, I accept the privacy policy terms	Yes	Antonio.brillantino@gmail.com	Brillantino	Antonio	â€œA. Cardarelliâ€ hospital, via A. Cardarelli, 9	Naples	Italy
Yes, I accept the privacy policy terms	Yes	gbrisin@tin.it	BRISINDA	GIUSEPPE	"Department of Surgery, Fondazione Policlinico Universitario A Gemelli IRCCS"	"Rome"	Italy
Yes, I accept the privacy policy terms	Yes	malomadabula@gmail.com	Bulanauca	Maloni	Department of Surgery Labasa Hospital Fiji	Labasa	Fiji
Yes, I accept the privacy policy terms	Yes	lbuonomo@gmail.com	BUONOMO	Luis	Director Emergency, Urgency and Trauma Surgery. University of Buenos Aires. ARGENTINA.	Buenos Aires.	Argentina
Yes, I accept the privacy policy terms	Yes	salvatore.buscemi02@unipa.it	Buscemi	Salvatore	department of surgical, oncology and oral science , university of Palermo	Palermo	Italy
Yes, I accept the privacy policy terms	Yes	giacomo.calini@gmail.com	Calini	Giacomo	University of Udine	Udine	Italy
Yes, I accept the privacy policy terms	Yes	drcalu@yahoo.com	Calu	Valentin	Department of General Surgery, Elias Emergency University Hospital	Bucharest	Romania
Yes, I accept the privacy policy terms	Yes	campanile@surgical.net	Campanile	Fabio Cesare	Division of General Surgery, Ospedale San Giovanni Decollato Andosilla, ASL VT	Civita Castellana	Italy
Yes, I accept the privacy policy terms	Yes	cs6andrea@gmail.com	Campos-Serra	Andrea	Hospital Universitari Parc TaulÃ­	Sabadell	Spain
Yes, I accept the privacy policy terms	Yes	chirurgia@capaldimassimo.it	Capaldi	Massimo	Department of Emergency and General Surgery, AO San Camillo - Forlanini	Rome	Italy
Yes, I accept the privacy policy terms	Yes	rcapoglu@gmail.com	Capoglu	Recayi	Sakarya EÄŸitim ve AraÅŸtÄ±rma Hastanesi	Sakarya	Turkey
Yes, I accept the privacy policy terms	Yes	Cardinali.luca@hotmail.it	Cardinali	Luca	Madonna del Soccorso General Hospital	San Benedetto del Tronto	Italy
Yes, I accept the privacy policy terms	Yes	filippocarletti1@gmail.com	CARLETTI	FILIPPO	Department of Surgery, Oncology and Gastroenterology, Urology Clinic, University of Padua, Padua, Italy	Padua	Italy
Yes, I accept the privacy policy terms	Yes	m.cascella@istitutotumori.na.it	CASCELLA	MARCO	Department of Anesthesia and Critical Care, Istituto Nazionale Tumori-IRCCS, Fondazione Pascale, Naples, Italy.	Napoli	Italy
Yes, I accept the privacy policy terms	Yes	gianmaria.casonipattacini@gmail.com	Casoni Pattacini	Gianmaria	Department of General Surgery,Emergencies and new technologies, baggiovara civil hospital Modena Italy	Modena	Italy
Yes, I accept the privacy policy terms	Yes	andreacavallaro@tiscali.it	Cavallaro	Andrea	Department of Surgery and medical surgical specialties. A.U.O.P. "G. Rodolico - San Marco" Catania	Catania	Italy
Yes, I accept the privacy policy terms	Yes	marco.ceresoli@unimib.it	Ceresoli	Marco	General and Emergency Surgery, Milano-Bicocca University, School of Medicine and Surgery	Monza	Italy
Yes, I accept the privacy policy terms	Yes	docmedalichaouch@gmail.com	CHAOUCH	MOHAMED ALI	Department of General Surgery, Monastir University Hospital	Monastir	Tunisia
Yes, I accept the privacy policy terms	Yes	dimitrisxatzipetris@yahoo.gr	Chatzipetris	Dimitrios	Department of Surgical Oncology, Metaxa Cancer Hospital	Piraeus	Greece
Yes, I accept the privacy policy terms	Yes	mlcy@hcuge.ch	Chevallay	Mickael	Department of abdominal surgery, Geneva university hospital	Geneva	Switzerland
Yes, I accept the privacy policy terms	Yes	mirceaxx@yahooo.com	chirica	mircea	Departement de Chirurgie Digestive, Centre Hospitalier Universitaire Grenoble Alpes	grenoble	France
Yes, I accept the privacy policy terms	Yes	macquy@gmail.com	CHOI	KYEONG WOON	Division of Gastrointestinal Surgery, Department of Surgery, Ilsan Paik Hospital, Inje University Colleage of Medicine	ILsan	Korea, South
Yes, I accept the privacy policy terms	Yes	chooklin_serge@hotmail.com	Chooklin	Serge	Department of Surgery, Lviv Regional Clinical Hospital	Lviv	Ukraine
Yes, I accept the privacy policy terms	Yes	cchouliaras@gmail.com	Chouliaras	C.	Department of Laparoscopic Surgery and Surgical Oncology, Athens Medical Center	Athens	Greece
Yes, I accept the privacy policy terms	Yes	dr_smahmud@yahoo.com	CHOWDHURY	SHARFUDDIN	Trauma Center, King Saud Medical City	Riyadh	Saudi Arabia
Yes, I accept the privacy policy terms	Yes	spyridon.christodoulou@yahoo.gr	Christodoulou	Spyridon	4th Department of Surgery, Attikon University Hospital	Athens	Greece
Yes, I accept the privacy policy terms	Yes	isaacchukwu8@gmail.com	Chukwu	Isaac	Department of Surgery, Federal Medical Center	Umuahia	Nigeria
Yes, I accept the privacy policy terms	Yes	ciancidoc1@virgilio.it	CIANCI	PASQUALE	Department of Surgery and Traumatology, Lorenzo Bonomo Hospital	Andria	Italy
Yes, I accept the privacy policy terms	Yes	pierfrancomaria.cicerchia@uniroma1.it	Cicerchia	Pierfranco Maria	Emergency surgery- Sapienza university of Rome	Rome	Italy
Yes, I accept the privacy policy terms	Yes	ncillara@gmail.com	Cillara	Nicola	UOC Chirurgia Generale, Santissima TrinitÃ Hospital	Cagliari	Italy
Yes, I accept the privacy policy terms	Yes	quiqueweb@hotmail.com	Colais-Ruiz	Enrique	Hospital Universitario Son LlÃ tzer	Palma de Mallorca	Spain
Yes, I accept the privacy policy terms	Yes	elifmangancolak@hotmail.com	COLAK	ELIF	University of Samsun	Samsun	Turkey
Yes, I accept the privacy policy terms	Yes	giuseppe.collura@opbg.net	Collura	Giuseppe	Bambino GesÃ¹ Children Hospital	Rome	Italy
Yes, I accept the privacy policy terms	Yes	lallipop@mweb.co.za	CRONJE	LARISSA	Department of Anaesthesia, Inkosi Albert Luthuli Hospital, UKZN	Durban	South Africa
Yes, I accept the privacy policy terms	Yes	Miguelcunha86@gmail.com	Cunha	Miguel	Colorectal surgery group, department of surgery, Algarve university hspital, Portimao, Portugal	Portimao	Portugal
Yes, I accept the privacy policy terms	Yes	rlcurado@mac.com	Curado	Rafael	Department of General Surgery, University of RibeirÃ£o Preto - Unaerp	RibeirÃ£o Preto	Brazil
Yes, I accept the privacy policy terms	Yes	silvia.curcio@studenti.unicz.it	CURCIO	SILVIA	Department of General Surgery, University "Magna Graecia" of Catanzaro	Catanzaro	Italy
Yes, I accept the privacy policy terms	Yes	currog@unicz.it	Curro	Giuseppe	Department of Health Science, Magna Graecia University of Catanzaro	Catanzaro	Italy
		s.cutti@smatteo.pv.it	Cutti	Sara			Italy
Yes, I accept the privacy policy terms	Yes	fabrizioda@gmail.com	D'ACAPITO	Fabrizio	Department of surgery, Morgagni-Pierantoni Hospital, auslromagna	ForlÃ¬	Italy
Yes, I accept the privacy policy terms	Yes	dimitris.damaskos@gmail.com	Damaskos	Dimitrios	Department of General Surgery, Royal Infirmary of Edinburgh	Edinburgh	United Kingdom
Yes, I accept the privacy policy terms	Yes	koraydas@yahoo.com	DAS	KORAY	Department of General Surgery, University of Health Sciences, Adana City Training and Research Hospital	Adana	Turkey
Yes, I accept the privacy policy terms	Yes	justindavies2000@yahoo.com	Davies	Justin	Cambridge Colorectal Unit, Addenbrooke's Hospital	Cambridge
Yes, I accept the privacy policy terms	Yes	joedawso@gmail.com	DAWSON	JOSEPH	Department of Trauma Surgery, Royal Adelaide Hospital	Adelaide	Australia
Yes, I accept the privacy policy terms	Yes	adebeaux@doctors.org.uk	DE BEAUX	ANDREW	Department of General Surgery, Royal Infirmary of Edinburgh	EDINBURGH	United Kingdom
Yes, I accept the privacy policy terms	Yes	desimone.belinda@gmail.com	De Simone	Belinda	Department of general and digestive minimally invasive surgery, Guastalla Hospital, AUSL-IRCSS Reggio Emilia, Guastalla, Italy	Guastalla	Italy
Yes, I accept the privacy policy terms	Yes	francesca.destefano1292@gmail.com	De Stefano	Francesca	Department of Genera Surgery, Sesto San Giovanni Hospital, Milan, Italy	Milano	Italy
Yes, I accept the privacy policy terms	Yes	degluc@inwind.it	Degrate	Luca	Department of Surgery, Fondazione IRCCS San Gerardo dei Tintori	Monza	Italy
Yes, I accept the privacy policy terms	Yes	vaihere.delaune@hcuge.ch	Delaune	Vaihere	Department of visceral surgery, Geneva University Hospitals	Geneva	Switzerland
Yes, I accept the privacy policy terms	Yes	zdemetr@yahoo.com	DEMETRASHVILI	ZAZA	Department of Surgery, Tbilisi State Medical University	Tbilisi	Georgia
Yes, I accept the privacy policy terms	Yes	andreas.demetriades@gmail.com	DEMETRIADES	ANDREAS K	Department of Neurosurgery, Royal Infirmary Edinburgh	Edinburgh	United Kingdom
Yes, I accept the privacy policy terms	Yes	smrdemirli@hotmail.com	Demirli Atici	Semra	Izmir Cigli Kent Hospital, Department of General Surgery	Ä°zmir	Turkey
Yes, I accept the privacy policy terms	Yes	dzemail.detanac@gmail.com	DETANAC	DZEMAIL	Department of general surgery, General hospital Novi Pazar	Novi Pazar	Serbia and Montenegro
Yes, I accept the privacy policy terms	Yes	sanjaydev72@gmail.com	Dev Singh	Sanjay	Department of General Surgery, Lahad Datu Hospital	Lahad Datu	Malaysia
Yes, I accept the privacy policy terms	Yes	giuseppe.dibuono@unipa.it	DI BUONO	GIUSEPPE	Department of Surgical, Oncological and Oral Sciences - University of Palermo	Palermo	Italy
Yes, I accept the privacy policy terms	Yes	idicarlo@unict.it	Di Carlo	Isidoro	Department of Surgical Sciences and Advanced Technologies â€œG.F. Ingrassia,â€	Catania	Italy
Yes, I accept the privacy policy terms	Yes	marcellodima@gmail.com	Di Martino	Marcello	AO Cardarelli	Napoli	Italy
Yes, I accept the privacy policy terms	Yes	salomone.disaverio@gmail.com	Di Saverio	Salomone	General surgery San benedetto del tronto Hospital	San Benedetto del Tronto	Italy
Yes, I accept the privacy policy terms	Yes	bogdan.diaconescu@yahoo.com	Diaconescu	Bogdan	Carol Davila University of Medicine and Pharmacy	Bucharest	Romania
Yes, I accept the privacy policy terms	Yes	bogdan.diaconescu@umfcd.ro	Diaconescu	Ionut Bogdan	Department of Surgery, Carol Davila University of Medicine and Pharmacy	Bucharest	Romania
Yes, I accept the privacy policy terms	Yes	evgeni_d1984@yahoo.com	DIMITROV	EVGENI	Department of Surgical Diseases, University Hospital "Prof. Dr. Stoyan Kirkovich"	Stara Zagora	Bulgaria
Yes, I accept the privacy policy terms	Yes	agrondogjani@yahoo.com	Dogjani	Agron	Department of Surgery, University of Medicine	Tirana	Albania
Yes, I accept the privacy policy terms	Yes	maurizio.domanin@unimi.it	DOMANIN	MAURIZIO	Dipartimento di Scienze Cliniche e di ComunitÃ UniversitÃ di Milano	Milano	Italy
Yes, I accept the privacy policy terms	Yes	t.dominionismatteo.pv.it	Dominioni	Tommaso	Dipartimento Emergenza Urgenza, Chirurgia Generale 1, Fondazione IRCCS Policlinico San Matteo, Pavia	Pavia	Italy
Yes, I accept the privacy policy terms	Yes	mario.doria88@outlook.com	D'Oria	Mario	Division of Vascular and Endovascular Surgery, Trieste University Hospital	Trieste	Italy
Yes, I accept the privacy policy terms	Yes	jdoucet@ucsd.edu	Doucet	Jay	Department of Surgery, University of California San Diego	San Diego	United States
Yes, I accept the privacy policy terms	Yes	chris.doudakmanis@gmail.com	DOUDAKMANIS	CHRISTOS	2nd Propaedeutic Department of Surgery, Laiko General Hospital of Athens	Athens	Greece
Yes, I accept the privacy policy terms	Yes	Arnaud.Dupuis@hcuge.ch	DUPUIS	ARNAUD	DÃ©partement of visceral surgery, university hospital of Geneva	Geneva	Switzerland
Yes, I accept the privacy policy terms	Yes	Virginia.dm.87@gmail.com	Durán Muñoz-Cruzado	Virginia	Department of General Surgery, Virgen del RocÃ­o University Hospital	Seville	Spain
Yes, I accept the privacy policy terms	Yes	barbora.east@gmail.com	East	Barbora	3rd Department of Surgery and 1st Medical Faculty of Charles University at Motol University Hospital	Prague	Czech Republic
Yes, I accept the privacy policy terms	Yes	Realayman@hotmail.com	ELAMIN	AIMAN	Department of General Surgery, Letterkenny University Hospital	Letterkenny	Ireland
Yes, I accept the privacy policy terms	Yes	Mujahidelhaj@gmail.com	Elhaj	Mujahid	Arrow Park Hospital , general surgery department	Birkenhead, Upton	United Kingdom
Yes, I accept the privacy policy terms	Yes	hazim.eltyeb@gmail.com	Eltyeb	Hazim	Department of General Surgery, The Newcastle Upon Tyne NHS Foundation Trust	Newcastle	United Kingdom
Yes, I accept the privacy policy terms	Yes	man_kaouras@hotmail.com	Emmanouil	Kaouras	Department of Surgical Oncology, Metaxa Cancer Hospital	Piraeus	Greece
Yes, I accept the privacy policy terms	Yes	natalie.enninghorst@newcastle.edu.au	Enninghorst	Natalie	University of Newcastle, Department of Traumatology John Hunter Hospital, Newcastle	Newcastle	Australia
Yes, I accept the privacy policy terms	Yes	merceestaire@hotmail.com	Estaire-Gomez	Mercedes	Department of Colorectal Surgery, Severo Ochoa University Hospital	Madrid	Spain
Yes, I accept the privacy policy terms	Yes	giuseppe_evola@hotmail.it	Evola	Giuseppe	General and Emergency Surgery Department	Catania	Italy
Yes, I accept the privacy policy terms	Yes	frr.fra@gmail.com	Ferrara	Francesco	Unit of General and Emergency Surgery, San Carlo Borromeo Hospital, ASST Santi Paolo e Carlo	Milan	Italy
Yes, I accept the privacy policy terms	Yes	luca.ferrario05@gmail.com	Ferrario	Luca	Emergency Department, Niguarda Ca' Granda Hospital, Milan, Italy	Milan	Italy
Yes, I accept the privacy policy terms	Yes	jacopotorva@yahoo.it	Ferrario di Tor Vajana	Antonjacopo	SSP	Lugano	Switzerland
Yes, I accept the privacy policy terms	Yes	franz.fleres@gmail.com	Fleres	Francesco	Department of Human Pathology of the Adult and Evolutive Age â€œGaetano Barresiâ€, Section of General and Emergency Surgery, University of Messina	Messina	Italy
Yes, I accept the privacy policy terms	Yes	alexforerogensurg@gmail.com	Forero-Torres	Alexander	Department of General Surgery, La Paz University Hospital	Madrid	Spain
Yes, I accept the privacy policy terms	Yes	laura9.fortuna@gmail.com	Fortuna	Laura	Digestive Surgery Unit, AOU Careggi, Firenze	Firenze	Italy
Yes, I accept the privacy policy terms	Yes	fragagp2008@gmail.com	Fraga	Gustavo P.	Division of Trauma Surgery, School of Medical Sciences, University of Campinas (Unicamp)	Campinas, SP	Brazil
Yes, I accept the privacy policy terms	Yes	Pietro.fransvea@gmail.com	Fransvea	Pietro	UOC Chirurgia dâ€™Urgenza e del Trauma, Fondazione Policlinico Universitario A Gemelli IRCCS	Rome	Italy
Yes, I accept the privacy policy terms	Yes	joanafrazao.fcm@gmail.com	Frazao	JOANA	Department of General Surgery, Hospital Prof. Doutor Fernando Fonseca	Amadora	Portugal
Yes, I accept the privacy policy terms	Yes	simone.frediani@opbg.net	frediani	simone	Bambin GesÃ¹ Children's Hospital	Rome	Italy
Yes, I accept the privacy policy terms	Yes	gachabayovmahir@gmail.com	Gachabayov	Mahir	Department of Surgery, New York Medical College	Valhalla, NY	United States
Yes, I accept the privacy policy terms	Yes	rita.galeiras.vazquez@gmail.com	Galeiras	Rita	Critical Care Unit. Complexo Hospitalario Universitario A CoruÃ±a	A CoruÃ±a	Spain
Yes, I accept the privacy policy terms	Yes	gaetanogallo1988@gmail.com	Gallo	Gaetano	Department of Surgery, Sapienza University of Rome	rome	Italy
Yes, I accept the privacy policy terms	Yes	ganchife1@gmail.com	Ganchi	Feroz	Department of surgery , university of KwaZulu-Natal, south Africa	durban	South Africa
Yes, I accept the privacy policy terms	Yes	simone.garg27@gmail.com	Gargarella	Simone	University Department of General Surgery - Ud'A Chieti Pescara	Chieti	Italy
Yes, I accept the privacy policy terms	Yes	gazali270.gu@gmail.com	GARZALI	IBRAHIM UMAR	Department of Surgery, Aminu Kano Teaching Hospital	Kano	Nigeria
Yes, I accept the privacy policy terms	Yes	wghnnam@gmail.com	Ghannam	Wagih	general &trauma surgery department Mansoura faculty of medicine Mansoura University Egypt	Mansoura	Egypt
Yes, I accept the privacy policy terms	Yes	faiznaj@usm.my	Ghazi	Faiz Najmuddin	Department of Surgery, School of Medical Sciences, Universiti Sains Malaysia	Kota Bharu	Malaysia
Yes, I accept the privacy policy terms	Yes	Alessio.giordano8@gmail.com	Giordano	Alessio	Department of Emergency, Emergency Surgery unit, Careggi University Hospital	Florence	Italy
Yes, I accept the privacy policy terms	Yes	dr.giorgiogiraudo@gmail.com	GIRAUDO	GIORGIO	Department of Surgery, AO Santa Croce e Carle, Cuneo	Cuneo	Italy
Yes, I accept the privacy policy terms	Yes	mario.giuffrida4@gmail.com	Giuffrida	Mario	General Surgery Unit, Parma university hospital	Parma	Italy
Yes, I accept the privacy policy terms	Yes	giuliicapp@gmail.com	GIULII CAPPONI	MICHELA	Department of Emergency, General Surgery, Ospedale Santo Spirito in Sassia	Roma	Italy
Yes, I accept the privacy policy terms	Yes	caxiaogomes@gmail.com	GOMES	Carlos Augusto	Surgery Unit, Hospital UniversitÃ¡rio Terezinha de Jesus, SUPREMA, Juiz de Fora	Juiz de Fora	Brazil
Yes, I accept the privacy policy terms	Yes	novo02@uol.com.br	GONSAGA	RICARDO ALESSANDRO TEIXEIRA	Department of surgery of trauma, Hospital Escola Padre Albino	Catanduva - SP	Brazil
Yes, I accept the privacy policy terms	Yes	emregonullu@gmail.com	Gonullu	Emre	Department of Gastrointestinal Surgery, Sakarya University school of medicine	Sakarya	Turkey
Yes, I accept the privacy policy terms	Yes	raquelgr901@gmail.com	GRACIA-ROMAN	RAQUEL	Department of General Surgery, Hospital Universitari Parc Tauli	Sabadell	Spain
Yes, I accept the privacy policy terms	Yes	ewen.griffiths@uhb.nhs.uk	Griffiths	Ewen A	Department of Upper GI Surgery, University Hospitals Birmingham NHS Foundation Trust	Birmingham	United Kingdom
Yes, I accept the privacy policy terms	Yes	dramit2411@gmail.com	Gupta	Amit	Department of Surgery All India Institute of Medical Sciences Rishikesh India	Rishikesh	India
Yes, I accept the privacy policy terms	Yes	drarifhameed@ums.edu.my	HAMEED SULTAN	MOHAMED ARIF	DEPARTMENT OF GENERAL SURGERY, FACULTY OF MEDICINE AND HEALTH SCIENCES, UNIVERSITY MALAYSIA SABAH	KOTA KINABALU, SABAH	Malaysia
Yes, I accept the privacy policy terms	Yes	safaahamid2020@gmail.com	Hamid	Safaa	Department of general surgery Midyork NHS trust	Leeds	United Kingdom
Yes, I accept the privacy policy terms	Yes	hardcastle@ukzn.ac.za	Hardcastle	Timothy	Department of Surgery, UKZN and Health Sciences DUT, Dept of Health, KZN South Africa	Durban	South Africa
Yes, I accept the privacy policy terms	Yes	m_firdaus@ums.edu.my	Hayati	Firdaus	Department of Surgery, Faculty of Medicine and Health Sciences, Universiti Malaysia Sabah	Kota Kinabalu, Sabah	Malaysia
Yes, I accept the privacy policy terms	Yes	ajhealey@doctors.org.uk	Healey	Andrew	Department of Surgery, Royal Infirmary of Edinburgh	Edinburgh	United Kingdom
Yes, I accept the privacy policy terms	Yes	basilibrahim1990@gmail.con	Ibrahim	Basil	Department of General Surgery, North Manchester General Hospital	Manchester	United Kingdom
Yes, I accept the privacy policy terms	Yes	ainifahriza@yahoo.com	IBRAHIM	AINI FAHRIZA	Department of Surgery, Universiti Malaysia Sarawak	Kuching	Malaysia
Yes, I accept the privacy policy terms	Yes	gazali270.gu@gmail.com	Ibrahim Umar	Garzali	Department of surgery, Aminu Kano Teaching Hospital, Kano, Nigeria	Kano	Nigeria
Yes, I accept the privacy policy terms	Yes	giuseppe.ietto@gmail.com	Ietto	Giuseppe	General, Emergency and Transplant Surgery Department, University of Insubria	Varese	Italy
Yes, I accept the privacy policy terms	Yes	telonakos@hotmail.com	Ioannidis	Orestis	4th Department of Surgery, Medical School, Aristotle University of Thessaloniki, General Hospital "George Papanikolaou"	Thessaloniki	Greece
Yes, I accept the privacy policy terms	Yes	ippoliti.simona@gmail.com	Ippoliti	Simona	Hull University Teaching Hospitals NHS	Hull	United Kingdom
Yes, I accept the privacy policy terms	Yes	kararda@yahoo.com	isik	arda	Department of General Surgery, Istanbul Medeniyet University Hospital	istanbul	Turkey
Yes, I accept the privacy policy terms	Yes	azzain_mahadi@hotmail.com	Ismail	Azzain	Queen Elizabeth Hospital	Birmingham	United Kingdom
Yes, I accept the privacy policy terms	Yes	ruhi@usim.edu.my	JAILANI	RUHI FADZLYANA	Surgical Unit, Faculty of Medicine & Health Sciences, Universiti Sains Islam Malaysia	NILAI, NEGERI SEMBILAN	Malaysia
Yes, I accept the privacy policy terms	Yes	drjangjiyoung@gmail.com	Jang	Ji Young	Department of Surgery, National Health Insurance Service Ilsan Hospital	Goyang	Korea, South
Yes, I accept the privacy policy terms	Yes	sungmin@paik.ac.kr	Jung	Sung Min	Department of General Surgery, Ilsan paik hospital, Inje University	Goyang	Korea, South
Yes, I accept the privacy policy terms	Yes	shakeelkader2006@gmail.com	Kader	Shakeel	Ukzn	Durban	South Africa
Yes, I accept the privacy policy terms	Yes	omerkamal1993@yahoo.com	KAMAL OMER	OMER	Department of orthopedic surgery in Gazira hospital	Medani	Sudan
Yes, I accept the privacy policy terms	Yes	stkapiris@hotmail.com	KAPIRIS	STYLIANOS	3rd Department of Surgery, "Evangelismos" Hospital	Athens	Greece
Yes, I accept the privacy policy terms	Yes	yasinkara32@windowslive.com	Kara	Yasin	Health Sciences University Istanbul Kanuni Sultan SÃ¼leyman Training and Research Hospital, Department of General Surgery	Istanbul	Turkey
Yes, I accept the privacy policy terms	Yes	gikats.md@gmail.com	Katsaros	Ioannis	First Department of Surgery, Laiko General Hospital, National and Kapodistrian University of Athens	Athens	Greece
Yes, I accept the privacy policy terms	Yes	alfiejose@gmail.com	Kavalakat	Alfie Jose	Department of General Surgery, Jubilee Mission Medical College and RI	Thrissur	India
Yes, I accept the privacy policy terms	Yes	aristotelis.kechagias@yahoo.gr	KECHAGIAS	ARISTOTELIS	Department of General Surgery, Metropolitan General Hospital	Athens	Greece
Yes, I accept the privacy policy terms	Yes	jkenig@cm-uj.krakow.pl	Kenig	Jakub	1st Department of General Surgery Jagiellonian University	Krakow	Poland
Yes, I accept the privacy policy terms	Yes	cleo.kenington@stgeorges.nhs.uk	Kenington	Cleo	Department of General Surgery, St George's Hospital	London	United Kingdom
Yes, I accept the privacy policy terms	Yes	bkkessel01@gmail.com	Kessel	Boris	Division of General Surgery&Trauma , Hillel Yaffe Medical Center	Hadera	Israel
Yes, I accept the privacy policy terms	Yes	vladimirkhokha@gmail.com	Khokha	Vladimir	Department of Emergency Surgery, Mozyr City Hospital	Mozyr	Belarus
Yes, I accept the privacy policy terms	Yes	khourydeeb10@gmail.com	KHOURY	DEEB	Department of General Surgery, Sheba University Medical Center	Ramat Gan	Israel
Yes, I accept the privacy policy terms	Yes	erythrokim@paik.ac.kr	Kim	Jae Il	Department of Surgery, Inje University Ilsan Paik Hospital	Goyang	Korea, South
Yes, I accept the privacy policy terms	Yes	rklappenbach@yahoo.com.ar	Klappenbach	Roberto	FundaciÃ³n Trauma, Buenos Aires	Buenos Aires	Argentina
Yes, I accept the privacy policy terms	Yes	kobeyoshiro@gmail.com	Kobe	Yoshiro	Department of Surgery, Fujita Health University Hospital	Toyoake	Japan
Yes, I accept the privacy policy terms	Yes	stkwfop@gmail.com	KOFOPOULOS	EFSTRATIOS	3RD DEPARTMENT OF SURGERY, ATTIKON HOSPITAL, NATIONAL AND KAPODISTRIAN UNIVERSITY OF ATHENS	ATHENS	Greece
Yes, I accept the privacy policy terms	Yes	kenneth.kok@ubd.edu.bn	Kok	Kenneth	PAPRSB Institute of Health Sciences, Universiti Brunei Darussalam	Bandar Seri Begawan	Brunei
Yes, I accept the privacy policy terms	Yes	victorywkong@yahoo.com	Kong	Victor	Department of Surgery, University of KwaZulu Natal	Durban	South Africa
Yes, I accept the privacy policy terms	Yes	dkorkolis_2000@yahoo.com	KORKOLIS	DIMITRIS	Department of Surgery, Hellenic Anticancer Hospital â€œSaint Savvasâ€	Athens	Greece
Yes, I accept the privacy policy terms	Yes	okorzh2006@ukr.net	KORZH	OLEKSII	Department of General Practice - Family Medicine, Kharkiv National Medical University	Kharkiv	Ukraine
Yes, I accept the privacy policy terms	Yes	jurij.kosir@gmail.com	KOSIR	JURIJ	Department of Abdominal Surgery, University Medical Centre Ljubljana	Ljubljana	Slovenia
Yes, I accept the privacy policy terms	Yes	georgios.koukoulis@gmail.com	Koukoulis	Georgios	Department of General Surgery, General Hospital of Larissa	Larissa	Greece
Yes, I accept the privacy policy terms	Yes	Dr.Bojan.Kovacevic@gmail.com	KOVACEVIC	BOJAN	Department of Surgical Oncology, Belgrade, UMC Zvezdara. Faculty of Dental Medicine, University of Belgrade	Belgrade	Serbia and Montenegro
Yes, I accept the privacy policy terms	Yes	Vitorfkruger@gmail.com	kruger	Vitor	Department of Trauma Surgery, University of Campinas	Campinas	Brazil
Yes, I accept the privacy policy terms	Yes	ikryvoruchko60@gmail.com	Kryvoruchko	Igor A.	Department of Surgery No.2. Kharkiv National Medical University,	Kharkiv	Ukraine
Yes, I accept the privacy policy terms	Yes	akira.kuriyama.jpn@gmail.com	Kuriyama	Akira	Emergency and Critical Care Center, Kurashiki Central Hospital	Kurashiki	Japan
Yes, I accept the privacy policy terms	Yes	eleandroskyros@gmail.com	KYROS	ELEANDROS	First Department of Surgery, Laiko General Hospital, Medical School, National and Kapodistrian University of Athens	Athens	Greece
Yes, I accept the privacy policy terms	Yes	aitorlandaluceolavarria@gmail.com	Landaluce-Olavarria	Aitor	Department of general surgery, Alfredo Espinosa Urduliz hospital, osakidetza	Urduliz	Spain
Yes, I accept the privacy policy terms	Yes	pierfrancesco.lapolla@uniroma1.it	Lapolla	Pierfrancesco	Dept. of Surgery Pietro Valdoni, Sapienza University of Rome	Rome	Italy
Yes, I accept the privacy policy terms	Yes	kwstaslasith@gmail.com	LASITHIOTAKIS	KONSTANTINOS	DEPARTMENT OF SURGERY, UNIVERSITY HOSPITAL OF HERAKLION, MEDICAL SCHOOL, UNIVERSITY OF CRETE	HERAKLION	Greece
Yes, I accept the privacy policy terms	Yes	aalitvin@gmail.com	Litvin	Andrey	AI Medica Hospital Center	Kaliningrad	Russia
Yes, I accept the privacy policy terms	Yes	aintzanelizarazu@hotmail.com	Lizarazu	Aintzane	General surgery, Hospital Universitario Donostia	Donostia	Spain
Yes, I accept the privacy policy terms	Yes	heura.ivy@gmail.com	Llaquet-Bayo	Heura	Departament of General Surgery, Hospital Universitari Parc TaulÃ­	Sabadell	Spain
Yes, I accept the privacy policy terms	Yes	eleonoralocci14@gmail.com	Locci	Eleonora	Department of Surgical Science of University of Cagliari	Cagliari	Italy
Yes, I accept the privacy policy terms	Yes	bolloon@hotmail.com	LOHSIRIWAT	VARUT	Colorectal surgery unit, Department of Surgery, Faculty of Medicine Siriraj Hospital, University	Bangkok	Thailand
Yes, I accept the privacy policy terms	Yes	claudiacristina.lopesmoreira@osakidetza.eus	Lopes	Claudia	Department of General Surgery, Hospital Zumarraga	Zumarraga	Spain
Yes, I accept the privacy policy terms	Yes	victorrelopez@gmail.com	Lopez Lopez	Victor	Clinic and University Virgen de la Arrixaca Hospital	Murcia	Spain
Yes, I accept the privacy policy terms	Yes	e.lostoridis@gmail.com	Lostoridis	Eftychios	Department of Surgery, Kavala General Hospital	Kavala	Greece
Yes, I accept the privacy policy terms	Yes	dl.davideluppi@gmail.com	LUPPI	DAVIDE	CHIRURGIA GENERALE E D'URGENZA, ASMN IRCCS REGGIO EMILIA	REGGIO EMILIA	Italy
Yes, I accept the privacy policy terms	Yes	gmmachain@yahoo.com	Machain V.	Gustavo Miguel	Cirugia- Servicios Medicos Migone	ASUNCIÃ“N	Paraguay
Yes, I accept the privacy policy terms	Yes	nmachair@gmail.com	MACHAIRAS	NIKOLAOS	2nd Department of Surgery, NKUA,	Athens	Greece
Yes, I accept the privacy policy terms	Yes	smagnone@asst-pg23.it	Magnone	Stefano	ASST Papa Giovanni XXIII	Bergamo	Italy
Yes, I accept the privacy policy terms	Yes	dr.eugenemah7@yahoo.com	MAH	JIN-JIUN	Department of Surgery, Queen Elizabeth Hospital	Kota Kinabalu	Malaysia
Yes, I accept the privacy policy terms	Yes	drmalli@gmail.com	MANANGI	MALLIKARJUNA	Department of General Surgery, Victoria Hospital, Bangalore Medical College & Research Institute	Bangalore	India
Yes, I accept the privacy policy terms	Yes	dmanatak@yahoo.gr	MANATAKIS	DIMITRIOS	Department of Surgery, Athens Naval and Veterans Hospital	Athens	Greece
Yes, I accept the privacy policy terms	Yes	a_mohamed154@alexmed.edu.eg	Mansy	Ahmed	Department of General Surgery, Alexandria University Hospitals	Alexandria	Egypt
Yes, I accept the privacy policy terms	Yes	barismantoglu@gmail.com	Mantoglu	Baris	Department of General Surgery, Sakarya University	Sakarya	Turkey
Yes, I accept the privacy policy terms	Yes	chiaramarafante@gmail.com	Marafante	Chiara	Department of General Surgery, Rivoli Hospital	Rivoli	Italy
Yes, I accept the privacy policy terms	Yes	giulianomarchetti@icloud.com	Marchetti	Giuliano	Bios Surgery Rome	Rome	Italy
Yes, I accept the privacy policy terms	Yes	margaris87@gmail.com	MARGARIS	IOANNIS	4th Department of Surgery, University General Hospital Attikon	Athens	Greece
Yes, I accept the privacy policy terms	Yes	Federico.mariani@ao-siena.toscana.it	Mariani	Federico	Department of Surgery Siena University Hospital	Siena	Italy
Yes, I accept the privacy policy terms	Yes	drmarinis@gmail.com	MARINIS	ATHANASIOS	Third Department of Surgery, Tzaneio General Hospital	Piraeus	Greece
Yes, I accept the privacy policy terms	Yes	evandroasm@yahoo.com.br	Mariot	Evandro Antonio Sbalcheiro	Department of Emergency Surgery, State University of Ponta Grossa Teaching Hospital	Ponta Grossa	Brazil
Yes, I accept the privacy policy terms	Yes	gennaromartines@gmail.com	Martines	Gennaro	Azienda Ospedaliero Universitaria Policlinico	Bari	Italy
Yes, I accept the privacy policy terms	Yes	saramnunez.nov@gmail.com	Martínez-Núñez	Sara	Department of General Surgery, Virgen del RocÃ­o University Hospital	Sevilla	Spain
Yes, I accept the privacy policy terms	Yes	aleix.martinez.perez@gmail.com	Martínez-Pérez	Aleix	Departent of General and Digestive Surgery, Hospital Universitario Doctor Peset.	Valencia	Spain
Yes, I accept the privacy policy terms	Yes	pietro.mascagni@ihu-strasbourg.eu	Mascagni	Pietro	Fondazione Policlinico Universitario A. Gemelli IRCCS, Rome, Italy; Institute for Image-Guided Surgery, IHU-Strasbourg, France	ROME, STRASBOURG	Italy
Yes, I accept the privacy policy terms	Yes	Veroux@unict.it	Massimiliano	Veroux	Department of surgery , University Hospital	Catania	Italy
Yes, I accept the privacy policy terms	Yes	simona.meneghini@yahoo.it	meneghini	simona	department of Emergency, Policlinico Umberto I, universitÃ la Sapienza	Rome	Italy
Yes, I accept the privacy policy terms	Yes	serhatmeric@yahoo.com.tr	Meric	Serhat	Department of General Surgery, Bagcilar Training and Research Hospital , Istanbul	Istanbul	Turkey
Yes, I accept the privacy policy terms	Yes	mesina.cristian@doctor.com	Mesina	Cristian	Emergency County Hospital of Craiova	Craiova	Romania
Yes, I accept the privacy policy terms	Yes	luca.miceli@cro.it	Miceli	Luca	Pain Medicine, IRCCS CRO di Aviano	Aviano (PN)	Italy
Yes, I accept the privacy policy terms	Yes	nmichal@med.uoa.gr	Michalopoulos	Nikolaos	Department of General Surgery, Attikon University Hospital	Athens	Greece
Yes, I accept the privacy policy terms	Yes	milana.flavio@gmail.com	MILANA	FLAVIO	Division of Hepatobiliary and General Surgery, Department of Surgery, Humanitas Research Hospital-IRCCS, Humanitas University, Rozzano, MI, Italy.	Rozzano, MI	Italy
Yes, I accept the privacy policy terms	Yes	siddigm419@gmail.com	Mohamed	Mohamed Siddig	University of Gezira faculty of medicine	Wadmedani	Sudan
Yes, I accept the privacy policy terms	Yes	dr.aliyasen1@gmail.com	Mohamedahmed	Ali Yasen	The Royal Wolverhampton NHS trust	Wolverhampton	United Kingdom
Yes, I accept the privacy policy terms	Yes	mr.jsuliman@gmail.com	Mohammed	Mohammed Jibreel	University Hospital Wishaw	Glasgow	United Kingdom
Yes, I accept the privacy policy terms	Yes	abdulaziz.siddig97@hotmail.com	Mohammed	Abdulaziz	Department of general surgery Watford general hospital	Watford	United Kingdom
Yes, I accept the privacy policy terms	Yes	maria.mondragon@nhs.net	MONDRAGON	MARIA	Department of general surgery, New Cross Hospital Wolverhampton	Wolverhampton	United Kingdom
Yes, I accept the privacy policy terms	Yes	dms11@me.com	Morales-Garcia	Dieter	Department of Surgery, University Hospital Virgen de la Victoria,	Malaga	Spain
Yes, I accept the privacy policy terms	Yes	daniele.morezzi@gmail.com	MOREZZI	DANIELE	Department of General Surgery, Maurizio Bufalini Hospital - Cesena	Cesena	Italy
Yes, I accept the privacy policy terms	Yes	fmucilli@unich.it	Mucilli	Felice	Director of University Department of General Surgery, Udâ€™A Chieti-Pescara	Chieti	Italy
Yes, I accept the privacy policy terms	Yes	muhamadhudmuhamadzin@gmail.com	Muhamad Hud	Muhamad Hud	Universiti Malaysia sabah	Kota Kinabalu	Malaysia
Yes, I accept the privacy policy terms	Yes	mans.muhrbeck@liu.se	Muhrbeck	Måns	Department of Surgery in NorrkÃ¶ping, and Department of Biomedical and Clinical Sciences, LinkÃ¶ping University	Linköping University	Sweden
Yes, I accept the privacy policy terms	Yes	rajarshi.mukherjee@liverpoolft.nhs.uk	Mukherjee	Rajarshi	Department of Emergency General and Major Trauma Surgery, Liverpool University Hospitals NHS Foundation Trust	Liverpool	United Kingdom
Yes, I accept the privacy policy terms	Yes	Ohsi79@hotmail.com	Mulas	Silvia	U.O.C.chirurgia generale dâ€™urgenza AOU Sassari	Sassari	Italy
Yes, I accept the privacy policy terms	Yes	oknarfmulita@hotmail.com	MULITA	FRANCESK	Department of Surgery, General University Hospital of Patras	Patras	Greece
Yes, I accept the privacy policy terms	Yes	LANNAVIOLI@GMAIL.COM	Muñoz Campaña	Anna	Department of emergency general surgery, univeristy hospital Parc Tauli	Sabadell	Spain
Yes, I accept the privacy policy terms	Yes	valentinamurzi@tiscali.it	murzi	valentina	Department of Emergency Surgery, Cagliari University Hospital	Cagliari	Italy
Yes, I accept the privacy policy terms	Yes	david.kursk@gmail.com	Naimzada	Mukhammad David	Laboratory of Public Health Indicators Analysis and Health Digitalization, Moscow Institute of Physics and Technology	Moscow	Russia
Yes, I accept the privacy policy terms	Yes	bruno.nardo.editor@gmail.com	Nardo	Bruno	Department of Pharmacy, Health and Nutritional Sciences, University of Calabria	Rende	Italy
Yes, I accept the privacy policy terms	Yes	inikolopoulos@gmail.com	Nikolopoulos	Ioannis	Lewisham and Greenwich NHS Trust	London	United Kingdom
Yes, I accept the privacy policy terms	Yes	nge2013.gen@gmail.com	nita	gabriela	Chirurgia Generale, Ospedale Sant'Anna, AUSL Reggio Emilia	Castelnovo ne' Monti	Italy
Yes, I accept the privacy policy terms	Yes	olmi.stefano@hsr.it	Olmi	Stefano	Department of general surgery, Policlinico San Marco	Zingonia	Italy
Yes, I accept the privacy policy terms	Yes	luca.orecchia@hotmail.com	Orecchia	Luca	Urology Unit, Department of Surgical Sciences, University of Rome Tor Vergata	Rome	Italy
Yes, I accept the privacy policy terms	Yes	orfanos.stamatios@gmail.com	ORFANOS	STAMATIOS	2nd Department of General Surgery, General Hospital of Athens "KAT"	ATHENS	Greece
Yes, I accept the privacy policy terms	Yes	faeid@usm.my	OTHMAN	MUHAMMAD FAEID	Department of Surgery, School of Medical Sciences, Universiti Sains Malaysia, Kubang Kerian, Kelantan, Malaysia	Kubang Kerian	Malaysia
Yes, I accept the privacy policy terms	Yes	mario.pacilli@unifg.it	pacilli	mario	Medical and Surgical sciences department, University of foggia	foggia	Italy
Yes, I accept the privacy policy terms	Yes	giuseppepalomba3@virgilio.it	Palomba	Giuseppe	Department of medicine and surgery, university of naples Federico II	Naples	Italy
Yes, I accept the privacy policy terms	Yes	desire.pantalone@unifi.it	Pantalone	Desire'	Emergency Department -University Hospital Careggi	Florence	Italy
Yes, I accept the privacy policy terms	Yes	dianaalejandrapantoja@gmail.com	Pantoja Pachajoa	Diana Alejandra	Departamento de Cirugia General, Clinica Universitaria Reina Fabiola	Cordoba	Argentina
Yes, I accept the privacy policy terms	Yes	arpadpanyko@gmail.com	PANYKO	ARPAD	4th Department of Surgery, University Hospital	Bratislava	Slovakia
Yes, I accept the privacy policy terms	Yes	mario.papa1993@gmail.com	Papa	Mario Virgilio	AORN Caserta	Caserta	Italy
Yes, I accept the privacy policy terms	Yes	Dimpapa7@hotmail.com	PAPACONSTANTINOU	DIMITRIOS	Third Department of Surgery, Attikon University Hospital	Athens	Greece
Yes, I accept the privacy policy terms	Yes	mpapadoliop@outlook.com	Papadoliopoulou	Maria	Department of General Surgery, Attikon University Hospital	Athens	Greece
Yes, I accept the privacy policy terms	Yes	papadopoulosaristeidis@gmail.com	PAPADOPOULOS	ARISTEIDIS	1st Surgical Department, General Hospital of Nikaia	Nikaia	Greece
Yes, I accept the privacy policy terms	Yes	dpapagoras@hotmail.com	Papagoras	Dimitris	Department of General Hospital of Trikala	Trikala	Greece
Yes, I accept the privacy policy terms	Yes	eleni.papamattheou@gmail.com	Papamattheou	Eleni	Department of General Surgery, Metaxa hospital	Athens	Greece
Yes, I accept the privacy policy terms	Yes	davide.papis@gmail.com	Papis	Davide	Department of General Surgery , Santâ€™Anna Hospital	Como	Italy
Yes, I accept the privacy policy terms	Yes	npararas@gmail.com	Pararas	Nikolaos	Third Surgical Department University of Athens, Attikon Hospital	Athens	Greece
Yes, I accept the privacy policy terms	Yes	jgparreira@uol.com.br	Parreira	Jose	Santa Casa School of Medical Sciences	SÃ£o Paulo	Brazil
Yes, I accept the privacy policy terms	Yes	francesco,pata@gmail.com	Pata	Francesco	Department of Pharmacy, Health and Nutritional Sciences, University of Calabria	Rende	Italy
Yes, I accept the privacy policy terms	Yes	Giovanna.pavone@unifg.it	Pavone	Giovanna	Department of Medical and Surgical Sciences, university hospital of Foggia	Foggia	Italy
Yes, I accept the privacy policy terms	Yes	francescapecc@gmail.com	Pecchini	Francesca	Division of General Surgery, of Emergency and New Technologies, Baggiovara General Hospital, Modena	modena	Italy
Yes, I accept the privacy policy terms	Yes	adam.peckham-cooper@nhs.net	Peckham-Cooper	Adam	Leeds Institute of Emergency General Surgery, Leeds Teaching Hospitals NHS Trust	Leeds	United Kingdom
Yes, I accept the privacy policy terms	Yes	gipe1984@gmail.com	Pellino	Gianluca	Colorectal Surgery, Vall d'Hebron University Hospital, Universitat Autonoma de Barcelona UAB	Barcelona	Spain
Yes, I accept the privacy policy terms	Yes	pelloni.maria@gmail.com	Pelloni	Maria	Departmenr Digestive and General Surgery, Gran Canaria University Hospital Dr Negrin , Las Palmas de Gran Canaria	Las Palmas de Gran Canaria	Spain
Yes, I accept the privacy policy terms	Yes	andrea.peloso@hcuge.ch	PELOSO	ANDREA	Department of General Surgery, Geneva University Hospital	Geneva	Switzerland
Yes, I accept the privacy policy terms	Yes	drbrunompereira@gmail.com	Pereira	Bruno	SÃ£o Luiz Campinas	Campinas	Brazil
Yes, I accept the privacy policy terms	Yes	kperi19@gmail.com	Perivoliotis	Konstantinos	Department of General Surgery, General Hospital of Volos	Volos	Greece
Yes, I accept the privacy policy terms	Yes	teresaperra1992@gmail.com	Perra	Teresa	Azienda Ospedaliero Universitaria di Sassari	Sassari	Italy
Yes, I accept the privacy policy terms	Yes	gennaro.perrone82@gmail.com	Perrone	Gennaro	Department of Emergency Surgery, Parma University Hospital	Parma	Italy
Yes, I accept the privacy policy terms	Yes	nino.fish@hotmail.it	PESCE	ANTONIO	Delta Hospital, AUSL of Ferrara, Department of Surgery	Ferrara	Italy
Yes, I accept the privacy policy terms	Yes	gpetracca63@gmail.com	Petracca	Giovanni	Department of General Surgery, Vibo Valentia	Vibo Valentia	Italy
Yes, I accept the privacy policy terms	Yes	vorapong.p@chula.ac.th	PHUPONG	VORAPONG	Department of Obstetrics and Gynecology, Faculty of Medicine, Chulalongkorn University	Bangkok	Thailand
Yes, I accept the privacy policy terms	Yes	biagiopicardi@gmail.com	Picardi	Biagio	Department of General and Emergency Surgery, San Filippo Neri Hospital	Roma	Italy
Yes, I accept the privacy policy terms	Yes	piccoli.micaela@aou.mo.it	piccoli	francesca	Division of General Surgery, of Emergency and New Technologies, Baggiovara General Hospital, Modena	Modena	Italy
Yes, I accept the privacy policy terms	Yes	edoardopicetti@hotmail.com	Picetti	Edoardo	Department of Anesthesia and Intensive Care, Parma University Hospital	Parma	Italy
Yes, I accept the privacy policy terms	Yes	mpikoul@med.uoa.gr	Pikoulis	Emmanouil	Third Department of Surgery, Attikon University Hospital	Athens	Greece
Yes, I accept the privacy policy terms	Yes	enricopinotti@hotmail.it	Pinotti	Enrico	Chirurgia Generale Ed Oncologica, Policlinico San Pietro	Ponte San Pietro	Italy
Yes, I accept the privacy policy terms	Yes	tadeja.pintar@kclj.si	Pintar	Tadeja	UMC Ljubljana and MF Ljubljana	Ljubljana	Slovenia
Yes, I accept the privacy policy terms	Yes	mauropodda@ymail.com	Podda	Mauro	Department of Surgical Science, University of Cagliari	Cagliari	Italy
Yes, I accept the privacy policy terms	Yes	alberto.porcu.1@gmail.com	Porcu	Alberto	Azienda Ospedaliero Universitaria di Sassari	Sassari	Italy
Yes, I accept the privacy policy terms	Yes	caterina@puccioni.org	Puccioni		Chirurgia d'Urgenza e del Trauma, Fondazione Policlinico Universitario Agostino Gemelli	Roma	Italy
Yes, I accept the privacy policy terms	Yes	razrimrahim@gmail.com	Rahim	Razrim	Department of Surgery, Universiti Sains Islam Malaysia.	Nilai	Malaysia
Yes, I accept the privacy policy terms	Yes	filiperamalhodealmeida@gmail.com	Ramalho de Almeida	Filipe	Department of General Surgery, Hospital Prof Doutor Fernando Fonseca	AMADORA	Portugal
Yes, I accept the privacy policy terms	Yes	faizur@usm.my	RAMELY	ROSNELIFAIZUR	Department of Surgery, Universiti Sains Malaysia	USM	Malaysia
Yes, I accept the privacy policy terms	Yes	kemrasa@gmail.com	RASA	Kemal	Department of General Surgery, Anadolu Medical Center	Kocaeli	Turkey
Yes, I accept the privacy policy terms	Yes	martin.reichert@chiru.med.uni-giessen.de	Reichert	Martin	Department of General, Visceral, Thoracic, Transplant and Pediatric Surgery, University Hospital of Giessen	Giessen	Germany
Yes, I accept the privacy policy terms	Yes	elisa.reitano@live.it	Reitano	Elisa	Research Institute against Digestive Cancer (IRCAD), Hopital Civil de Strasbourg	Strasbourg	France
Yes, I accept the privacy policy terms	Yes	spribas@gmail.com	RIBAS	SONIA	Department of General Surgery, CH PÃ³voa de Varzim-Vila do Conde	PÃ³voa de Varzim	Portugal
Yes, I accept the privacy policy terms	Yes	rita.rodriguez-luna@ircad.fr	Rodriguez-Luna	Maria Rita	Research Institute against Digestive Cancer (IRCAD)	Strasbourg	France
Yes, I accept the privacy policy terms	Yes	droizblatt@gmail.com	Roizblatt	Daniel	Surgery Department, Hospital del Trabajador	Santiago	Chile
Yes, I accept the privacy policy terms	Yes	andrea.romanzi@gmail.com	ROMANZI	ANDREA	Department of General Surgery, Valduce Hospital	Como	Italy
Yes, I accept the privacy policy terms	Yes	fausto.rosa@poiclinicogemelli.it	ROSA	FAUSTO	Emergency and Trauma Surgery, Fondazione Policlinico Universitario "A. Gemelli" IRCCS, UniversitÃ Cattolica del Sacro Cuore	Rome	Italy
Yes, I accept the privacy policy terms	Yes	francesco_roscio@yahoo.it	Roscio	Francesco	Division of General and Minimally invasive Surgery - ASTT Valle Olona	Busto Arsizio	Italy
Yes, I accept the privacy policy terms	Yes	stefanoro1970@gmail.com	Rossi	Stefano	Emergency and general surgery San Filippo Neri hospital ASL Roma1	Rome	Italy
Yes, I accept the privacy policy terms	Yes	aniaroza@tlen.pl	Różańska-Walędziak	Anna	Department of Human Physiology and Pathophysiology, Faculty of Medicine, Collegium Medicum, Cardinal Stefan Wyszynski University	Warsaw	Poland
Yes, I accept the privacy policy terms	Yes	bsakakushev@gmail.com	Sakakushev	Boris		Research Institute at Medical University Plovdiv/RIMU/ Department of Propedeutics of Surgical Diseases/ UMHAT St George Plovdiv, First Clinic of General Surgery	Bulgaria
Yes, I accept the privacy policy terms	Yes	sall_i17@yahoo.fr	Sall	Ibrahima	Department of general surgery, Military teaching hospital	Dakar	Senegal
Yes, I accept the privacy policy terms	Yes	francesco.salvetti02@universitadipavia.it	SALVETTI	FRANCESCO	General Surgery Residency Program, University of Pavia,	Pavia	Italy
Yes, I accept the privacy policy terms	Yes	lasithamfc@gmail.com	Samarakoon	Lasitha Bhagya	Consultant in General surgery , University Hospitals of Leicester , United Kingdom	United Kingdom	United Kingdom
Yes, I accept the privacy policy terms	Yes	fabrizio.sammartano@asst-santipaolocarlo.it	Sammartano	Fabrizio	SSDTrauma Team, San Carlo Borromeo Trauma Center	Milan	Italy
Yes, I accept the privacy policy terms	Yes	robert.sawyer@med.wmich.edu	Sawyer	Robert	DEpartment of Surgery, Western Michigan University Homer Stryker MD School of Medicine	Kalamazoo	United States
Yes, I accept the privacy policy terms	Yes	Scheiterlem@aou-careggi.toscana.it	Scheiterle	Maximilian	Sod Chirurgia d Urgenza, AOU Careggi	Firenze	Italy
Yes, I accept the privacy policy terms	Yes	hhaassll@gmail.com	Segovia Lohse	Helmut	II CÃ¡tedra de ClÃ­nica QuirÃºrgica, Hospital de ClÃ­nicas, Universidad Nacional de AsunciÃ³n	San Lorenzo	Paraguay
Yes, I accept the privacy policy terms	Yes	babismed@gmail.com	SERETIS	CHARALAMPOS	Department of General Surgery, General Hospital of Patras	Patra	Greece
Yes, I accept the privacy policy terms	Yes	giacomo.sermonesi@gmail.com	Sermonesi	Giacomo	Department of Medical and Surgical Sciences	Bologna	Italy
Yes, I accept the privacy policy terms	Yes	marioserradilla@hotmail.com	Serradilla-Martín	Mario	Instituto de InvestigaciÃ³n Sanitaria AragÃ³n, Department of Surgery, Miguel Servet University Hospital	Zaragoza	Spain
Yes, I accept the privacy policy terms	Yes	Vgshelat@gmail.com	Shelat	Vishal	Department of General Surgery, Tan Tock Seng Hospital	Singapore	Singapore
Yes, I accept the privacy policy terms	Yes	Shlyapnikov@Gmail.com	Shlyapnikov	Sergei	Department of Surgical infections, Saint-Petersburg Emergency Care Science research Institute	Saint-Petersburg	Russia
Yes, I accept the privacy policy terms	Yes	theosidiropoulos@hotmail.com	Sidiropoulos	Theodoros	4th Department of Surgery, Attikon University Hospital	Athens	Greece
Yes, I accept the privacy policy terms	Yes	msiem@wp.pl	Sieminski	Mariusz	Department of Emergency Medicine, Medical University of Gdansk,	Gdansk	Poland
Yes, I accept the privacy policy terms	Yes	leandros93@hotmail.it	SIRAGUSA	LEANDRO	Department of surgical services, University of Rome â€œTor Vergataâ€	Rome	Italy
Yes, I accept the privacy policy terms	Yes	boonying22@gmail.com	Siribumrungwong	Boonying	Department of Surgery, Thammasat University Hospital, Thammasat University	Pathum Thani	Thailand
Yes, I accept the privacy policy terms	Yes	mihail_slavchev@yahoo.com	SLAVCHEV	MIHAIL	Department of General Surgery, University Hospital - Eurohospital	Plovdiv	Bulgaria
Yes, I accept the privacy policy terms	Yes	Alitzamendez@gmail.com	Sosa	Dianne	Department of General Surgery, Hospital General San Juan de Dios	Guatemala	Guatemala
Yes, I accept the privacy policy terms	Yes	marosotiropoulou@gmail.com	Sotiropoulou	Maria	Evaggelismos General Hospital Athens Greece	Athens	Greece
Yes, I accept the privacy policy terms	Yes	t.sovatzidis@gmail.com	SOVATZIDIS	APOSTOLOS	Department of General Surgery, Giannitsa General Hospital	Giannitsa	Greece
Yes, I accept the privacy policy terms	Yes	Philip.Stahel@gmail.com	Stahel	Philip Frank	Department of Surgery, East Carolina University, Brody School of Medicine	Greenville, North Carolina	United States
Yes, I accept the privacy policy terms	Yes	st.stamiris@hotmail.com	STAMIRIS	STAVROS	DEPARTMENT OF ORTHOPEDIC SURGERY, 424 G.M.H THESSALONIKI	THESSALONIKI	Greece
Yes, I accept the privacy policy terms	Yes	drsnsatish06@gmail.com	Subbiah Nagaraj	Satish	Department of General Surgery, Postgraduate Institute of Medical Education and Research, Chandigarh, India	Chandigarh	India
Yes, I accept the privacy policy terms	Yes	sentilsubra@gmail.com	Subramaniam	Sentilnathan	Department of General Surgery, Hospital Queen Elizabeth	kota kinabalu	Malaysia
Yes, I accept the privacy policy terms	Yes	sentilsubra@gmail.com	SUBRAMANIAM	SENTILNATHAN	Department of General Surgery, Queen Elizabeth Hospital, Sabah, Malaysia	Kota Kinabalu	Malaysia
Yes, I accept the privacy policy terms	Yes	drwajdy@hotmail.com	SULIMAN	Wajdy	DepT of General surgery, Dallah hospital	Riyadh	Saudi Arabia
Yes, I accept the privacy policy terms	Yes	rsydorchuk@bsmu.edu.ua	Sydorchuk	Ruslan	Department of Surgery, Chernivtsi Regional A&E Hospital	Chernivtsi	Ukraine
Yes, I accept the privacy policy terms	Yes	lsydorchuk@ukr.net	Sydorchuk	Larysa	Bukovinian State Medical University	Chernivtsi	Ukraine
Yes, I accept the privacy policy terms	Yes	esynekidou@gmail.com	Synekidou	Eirini	Department of General Surgery Florina General Hospital	Florina	Greece
Yes, I accept the privacy policy terms	Yes	ltallona@hotmail.com	Tallon-Aguilar	Luis	Department of Surgery, Virgen del RocÃ­o University Hospital	Sevilla	Spain
Yes, I accept the privacy policy terms	Yes	edward.tan@radboudumc.nl	Tan	Edward	Department of Surgery-Traumasurgery Radboudumc	Nijmegen	Netherlands
Yes, I accept the privacy policy terms	Yes	huei_87@hotmail.com	TAN	JIH HUEI	DEPARTMENT OF GENERAL SURGERY, SULTANAH AMINAH HOSPITAL	JOHOR BAHRU	Malaysia
Yes, I accept the privacy policy terms	Yes	ctandup@gmail.com	TANDUP	CHERRING	Department of General Surgery, PGIMER CHANDIGARH	CHANDIGARH, INDIA	India
Yes, I accept the privacy policy terms	Yes	nicola.tartaglia@unifg.it	Tartaglia	Nicola	Department of Medical And Surgical Sciences, University Hospital of Foggia	Foggia	Italy
Yes, I accept the privacy policy terms	Yes	John.taylor@rcsed.net	Taylor	John	Department of General Surgery. University Hospital Aintree	Liverpool	United Kingdom
Yes, I accept the privacy policy terms	Yes	gtebala@gmail.com	Tebala	Giovanni	Department of Digestive and Emergency Surgery, Azienda Ospedaliera S.Maria	Terni	Italy
Yes, I accept the privacy policy terms	Yes	giovannitomasicchio92@gmail.com	Tomasicchio	Giovanni	Department of Emergency and Organ Transplantation, School of Medicine, University of Bari â€œAldo Moroâ€, Piazza G Cesare, 11, 70124 Bari, Italy	BARI	Italy
Yes, I accept the privacy policy terms	Yes	atoroct@gmail.com	Toro	Adriana	E. Muscatello, Augusta Hospital	Siracusa	Italy
Yes, I accept the privacy policy terms	Yes	enzotrapani@hotmail.it	Trapani	Vincenzo	General Surgery, new Technologies and emergency, Baggiovara General Hospital	Modena	Italy
Yes, I accept the privacy policy terms	Yes	t_triantafilou@yahoo.com	Triantafyllou	Tania	Department of General Surgery, Royal Infirmary of Edinburgh	Edinburgh	United Kingdom
Yes, I accept the privacy policy terms	Yes	marziatripepi90@gmail.com	Tripepi	Marzia	Department of General and hepatobiliary Surgery, Verona University Hospital	Verona	Italy
Yes, I accept the privacy policy terms	Yes	juliotrostchansky@gmail.com	Trostchansky	Julio	Departamento de CirugÃ­a de TÃ³rax,Hospital Maciel	Montevideo	Uruguay
Yes, I accept the privacy policy terms	Yes	juliotrostchansky@gmail.com	TROSTCHANSKY	JULIO	DEPARTAMENTO CIRUGÃŒA DE TORAX ,HOSPITAL MACIEL	MONTEVIDEO	Uruguay
Yes, I accept the privacy policy terms	Yes	kostastsekos@gmail.com	TSEKOYRAS	KONSTANTINOS	SISMANOGLIO GENERAL HOSPITAL	Athens	Greece
Yes, I accept the privacy policy terms	Yes	Victorturradorodriguez@gmail.com	Turrado-Rodriguez	Victor	Department of Gastrointestinal Surgery, Hospital Clinic de Barcelona	Barcelona	Spain
Yes, I accept the privacy policy terms	Yes	la.tutino@gmail.com	TUTINO	ROBERTA	UOC Chirurgia generale d'urgenza e PS - Presidio ospedaliero Molinette - AOU CittÃ della Salute e della Scienza di Torino	Torino	Italy
Yes, I accept the privacy policy terms	Yes	matteo.uccelli@gmail.com	UCCELLI	MATTEO	General and Oncological Surgery Department - San Marco Hospital GSD	Zingonia (BG)	Italy
Yes, I accept the privacy policy terms	Yes	puchikov@yahoo.com	UCHIKOV	PETAR	Department of Special surgery, Medical university Plovdiv	Plovdiv	Bulgaria
Yes, I accept the privacy policy terms	Yes	bakarne.ugartesierra@gmail.com	UGARTE-SIERRA	BAKARNE	Department of General Surgery, Galdakao University Hospital	Galdakao	Spain
Yes, I accept the privacy policy terms	Yes	mika.ukkonen@fimnet.fi	Ukkonen	Mika	Department of Surgery, Kuopio University Hospital	Kuopio	Finland
Yes, I accept the privacy policy terms	Yes	mike_vailas@yahoo.com	VAILAS	MICHAIL	Laiko General Hospital -1st department of surgery	Athens	Greece
Yes, I accept the privacy policy terms	Yes	Mariarosaria.valenti@gmail.com	Valenti	Maria Rosaria	U.O.C. Chirurgia Generale III, A.O.U.P. "G. Rodolico - San Marco", Catania	Catania	Italy
Yes, I accept the privacy policy terms	Yes	vasilescu.alin@gmail.com	VASILESCU	ALIN MIHAI	Department of General Surgery, Grigore T Popa University of Medicine and Pharmacy, St Spiridon University Hospital	Iasi	Romania
Yes, I accept the privacy policy terms	Yes	jezequiel.verde@gmail.com	Verde	Juan Ezequiel	Department of General Surgery, Hospital Austral	Buenos Aires	Argentina
Yes, I accept the privacy policy terms	Yes	juan.verde@ihu-strasbourg.eu	Verde	Juan Manuel	IHU Strasbourg	Strasbourg	France
Yes, I accept the privacy policy terms	Yes	dauniaverdi@libero.it	Verdi	Daunia	General Surgery, Mirano Hospital	Venice	Italy
Yes, I accept the privacy policy terms	Yes	georgiosverras@gmail.com	VERRAS	GEORGIOS IOANNIS	Department of General Surgery, General University Hospital of Patras	Patras	Greece
Yes, I accept the privacy policy terms	Yes	francesca.vescio@studenti.unicz.it	Vescio	Francesca	Department of General Surgery, University â€œMagna Graeciaâ€ of Catanzaro	Catanzaro	Italy
Yes, I accept the privacy policy terms	Yes	jacopovigano@me.com	Viganò	Jacopo	General Surgery 1, Fondazione IRCCS Policlinico San Matteo	Pavia	Italy
Yes, I accept the privacy policy terms	Yes	vincoligiusy@libero.it	VINCOLI	GIUSEPPINA	Department of Medicine, Unit of Gastroenterology, Ospedale S.Camillo De Lellis - ASL RIETI	Rieti	Italy
Yes, I accept the privacy policy terms	Yes	diegovisconti81@gmail.com	Visconti	Diego	Chirurgia Generale dâ€™Urgenza e PS - AOU CittÃ¡ della Salute e della Scienza	Turin	Italy
Yes, I accept the privacy policy terms	Yes	alexvittori82@gmail.com	VITTORI	ALESSANDRO	Department of Anesthesia and Critical Care, ARCO ROMA, Ospedale Pediatrico Bambino GesÃ¹ IRCCS	Rome	Italy
Yes, I accept the privacy policy terms	Yes	nutu.vlad@gmail.com	VLAD	NUTU	Department of I General Surgery and Liver Transplant, University Hospital â€œSaint Spiridonâ€ Iasi, Romania	Iasi	Romania
Yes, I accept the privacy policy terms	Yes	Christos.vosinakis95@gmail.com	Vosinakis	Christos	Department of Plastic Surgery, Hull University Teaching Hospitals NHS Trust	Hull	United Kingdom
Yes, I accept the privacy policy terms	Yes	maciej.waledziak@gmial.com	Walędziak	Maciej	Department of General, Oncological, Metabolic and Thoracic Surgery, Military Institute of Medicineâ€”National Research Institute	Warsaw	Poland
Yes, I accept the privacy policy terms	Yes	imtazwani@gmail.com	Wani	Imtiaz	Department of Minimal Access and General Surgery	Srinagar	India
Yes, I accept the privacy policy terms	Yes	tpn059@gmail.com	Wannatoop	Tongporn	Division of Trauma surgery,Department of Surgery,Faculty Medicine Siriraj hospital,Mahidol university	Bangkok	Thailand
Yes, I accept the privacy policy terms	Yes	clemens.weber@uis.no	Weber	Clemens	Department of Neurosurgery, Stavanger University Hospital	Stavanger	Norway
Yes, I accept the privacy policy terms	Yes	lukas_widmer@bluewin.ch	WIDMER	LUKAS WERNER	Department of Visceral Surgery and Medicine, Inselspital, Bern University Hospital, University of Bern	Bern	Switzerland
Yes, I accept the privacy policy terms	Yes	jaredwohlgemut@gmail.com	WOHLGEMUT	JARED MARK	Department of General Surgery, Queen Elizabeth University Hospital	Glasgow	United Kingdom
Yes, I accept the privacy policy terms	Yes	tinghway.wong@duke-nus.edu.sg	Wong	Ting Hway	Duke-NUS Medical School	Singapore	Singapore
Yes, I accept the privacy policy terms	Yes	sofiabecks@yahoo.gr	Xenaki	Sofia	Department of Surgery - University Hospital of Heraklion Crete, Greece	Heraklion Crete	Greece
Yes, I accept the privacy policy terms	Yes	ademyuksel@sakarya.edu.tr	YUKSEL	ADEM	Department of General Surgery, Sakarya University Hospital	Sakarya	Turkey
Yes, I accept the privacy policy terms	Yes	georgioszacharis@gmail.com	ZACHARIS	GEORGIOS	DEPARTMENT OF GEMERAL SURGERY, PATRA ST.ANDREW HOSPITAL GREECE	Patra	Greece
Yes, I accept the privacy policy terms	Yes	claudiazaghi@gmail.com	Zaghi	Claudia	Departement of General Surgery, San Bortolo Hospital	Vicenza	Italy
Yes, I accept the privacy policy terms	Yes	andee@usm.my	Zakaria	Andee Dzulkarnaen	Department of Surgery & Hospital USM, School of Medical Sciences, Universiti Sains Malaysia	Kubang Kerian, Kelantan	Malaysia
Yes, I accept the privacy policy terms	Yes	marty.zambon@gmail.com	Zambon	Martina	Department of Emergency Surgery, Sapienza University	Rome	Italy
Yes, I accept the privacy policy terms	Yes	nikoszampitis@gmail.com	Zampitis	Nikolaos	Third Surgical Department, Tzaneio Hospital of Piraeus	Pireaus	Greece
Yes, I accept the privacy policy terms	Yes	fabio.zattoni@unipd.it	Zattoni	Fabio	Urology Unit, Department of Surgery, Oncology and Gastroenterology, University of Padova, Padova, Italy	Padua	Italy
Yes, I accept the privacy policy terms	Yes	p.ziprin@imperial.ac.uk	Ziprin	Paul	Department of Surgery, Imperial College Healthcare NHS Trust	London	United Kingdom
Yes, I accept the privacy policy terms	Yes	nzubareva07@mail.ru	Zubareva	Nadezhda	E.A. Wagner State Medical University	Perm	Russia
